# Supplementary material for: Molecular characterization of projection neuron subtypes in the mouse olfactory bulb
Source: eLife journal article supplement (doi:10.7554/elife.65445), 2021-07-22
Supplement: supp [file elife-65445-supp-v1.zip]

Archive with 12 entries (12 files):
- elife_poa_e65445_Transparent_Reporting_File.pdf
- elife_poa_e65445_Figure_1_figure_supplement_1.pdf
- elife_poa_e65445_Figure_1_figure_supplement_2.pdf
- elife_poa_e65445_Figure_2_figure_supplement_1.pdf
- elife_poa_e65445_Figure_3_figure_supplement_1.pdf
- elife_poa_e65445_Figure_3_figure_supplement_2.pdf
- elife_poa_e65445_Figure_3_figure_supplement_3.pdf
- elife_poa_e65445_Figure_4_figure_supplement_1.pdf
- elife_poa_e65445_Figure_4_figure_supplement_2.pdf
- elife_poa_e65445_Figure_4_figure_supplement_3.pdf
- elife_poa_e65445_Figure_5_figure_supplement_1.pdf
- elife_poa_e65445_Figure_5_figure_supplement_2.pdf
