# Supplementary material for: Molecular characterization of projection neuron subtypes in the mouse olfactory bulb
Source: eLife journal article supplement (doi:10.7554/elife.65445), 2021-07-22

# Figure3-figure supplement3

**A**

## Excitability-related differential gene expression

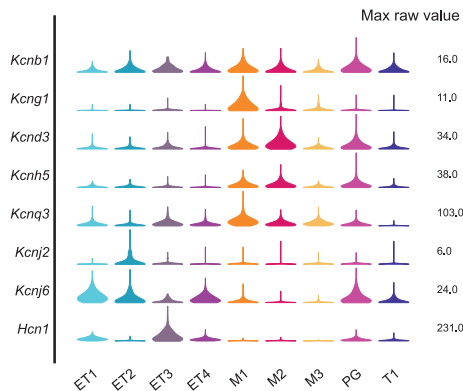

**B**

## Cell adhesion-related differential gene expression

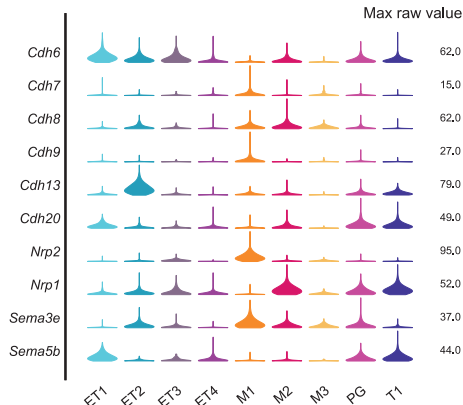

**C**

## Pan-mitral and tufted cell genes

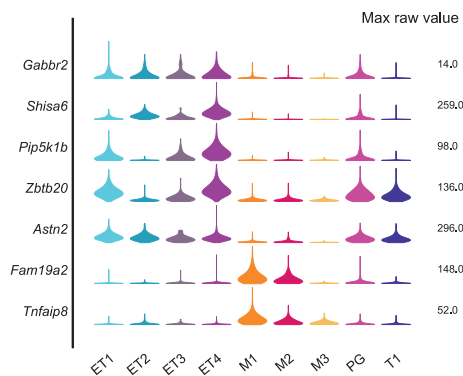

Supplement: supp [file elife-65445-supp-v1.zip › elife_poa_e65445_Figure_3_figure_supplement_3.pdf]
