# Supplementary material for: Molecular characterization of projection neuron subtypes in the mouse olfactory bulb
Source: eLife journal article supplement (doi:10.7554/elife.65445), 2021-07-22
Supplement: supp [file elife-65445-supp-v1.zip › elife_poa_e65445_Figure_4_figure_supplement_2.pdf]

Figure4-figure supplement2

A

M and T cell type-specific marker genes identified as regulons

| Cell type | Marker gene |           | As regulon at max confidence cutoff |     |     |          |         |
|-----------|-------------|-----------|-------------------------------------|-----|-----|----------|---------|
|           |             |           | 0.3                                 | 0.4 | 0.5 | 0.6      | 0.7 0.8 |
| M1        | Lhx5        |           | Lhx5(+)                             |     |     |          |         |
| T1        | Barhl2      | Barhl2(+) |                                     |     |     |          |         |
| ET1       | Rorb        | Rorb(+)   |                                     |     |     |          |         |
| ET2       | Nr2f2       |           | Nr2f2(+)                            |     |     |          |         |
|           | Lhx1        |           |                                     |     |     |          | Lhx1(+) |
|           | Uncx        |           |                                     |     |     |          | Uncx(+) |
| ET4       | Foxo1       |           |                                     |     |     | Foxo1(+) |         |

B

M and T cell type-specific marker genes identified as target genes

| Cell type | Marker gene |                       | As marker gene in regulon at max confidence cutoff |                     |                      |                                                        |
|-----------|-------------|-----------------------|----------------------------------------------------|---------------------|----------------------|--------------------------------------------------------|
|           |             |                       | 0.5                                                | 0.6                 | 0.7                  | 0.8                                                    |
| M1        | Doc2b       |                       |                                                    |                     |                      | Taf1(+)                                                |
|           | Nrp2        |                       |                                                    | Pbx3(+)             |                      |                                                        |
|           | Chrna5      |                       |                                                    | Alx1(+)             |                      |                                                        |
|           | Gabra2      |                       |                                                    | Pbx3(+)             |                      | Xrcc4(+)                                               |
|           | Ebf1        |                       |                                                    | Pbx3(+)             |                      | Xrcc4(+)                                               |
|           | Lhx5        | Ctcf(+)               |                                                    | Mitf(+)             |                      | Pbx3(+)                                                |
| M2        | C1ql1       |                       |                                                    |                     |                      | Dlx5(+)                                                |
|           | Nts         |                       |                                                    |                     | Jund(+)              |                                                        |
|           | Samsn1      | Hlf(+)                |                                                    |                     |                      |                                                        |
|           | Grid2       | Dmrta1(+)             |                                                    |                     |                      |                                                        |
|           | Sema6d      |                       |                                                    | Smarca4(+)          | Pbx3(+)              | Mxi1(+)                                                |
| M3        | Smpx        |                       |                                                    |                     |                      | Sox2(+)                                                |
|           | Ets1        | Klf2(+)               |                                                    |                     |                      |                                                        |
|           | Cnr1        |                       |                                                    |                     |                      | Jund(+)<br>Dlx1(+)<br>Bhlhe22(+)                       |
|           | Cadps2      |                       |                                                    |                     | Foxo3(+)             |                                                        |
|           | Fst         | Sall4(+)              |                                                    | Klf3(+)             | Pbx3(+)              | Bmyc(+)<br>Srebf2(+)<br>Egr1(+)<br>Jund(+)<br>Klf13(+) |
|           | Barhl2      | Usf2(+)<br>Atf1(+)    |                                                    |                     | Hnrnp1l(+)<br>Hlf(+) | Pou3f3(+)<br>Cux1(+)<br>Srebf2(+)                      |
|           | Tspan10     | Mlxip(+)              |                                                    |                     |                      |                                                        |
| T1        | Cacna1g     |                       |                                                    |                     | Glis1(+)             | Pbx3(+)<br>Cux1(+)                                     |
|           | Fam84b      | Rcor1(+)              |                                                    |                     |                      | Cux1(+)<br>Srebf2(+)                                   |
|           | Rxfp1       |                       |                                                    |                     | Esrra(+)             |                                                        |
|           | Wnt5b       | Rcor1(+)<br>Esrrg(+)  |                                                    |                     | Cux1(+)              |                                                        |
| ET1       | Rorb        | Neurod2(+)<br>Cux1(+) |                                                    | Mitf(+)<br>Rcor1(+) | Hnrnp1l(+)           | Srebf2(+)<br>Rbbp5(+)                                  |
|           | Clcf1       | Foxo1(+)              |                                                    |                     | Cux1(+)              |                                                        |
|           | Ebf2        | Nfib(+)               |                                                    |                     |                      | Pbx3(+)                                                |
| ET2       | Uncx        | Nr2f2(+)              |                                                    |                     |                      | Pbx3(+)<br>Uncx(+)<br>Lhx1(+)                          |
|           | Nr2f2       | Nr2f2(+)              |                                                    | Jund(+)             | Uncx(+)<br>Klf6(+)   | Pbx3(+)<br>Lef1(+)                                     |
|           | Ebf3        | Nr2f2(+)              |                                                    |                     |                      | Pbx3(+)<br>Uncx(+)<br>Ppargc1a(+)                      |
|           | Psrc1       |                       |                                                    |                     | Mxi1(+)              |                                                        |
|           | Edn1        | Lhx1(+)<br>Runx3(+)   |                                                    |                     | Glis1(+)             | Pbx3(+)                                                |
|           | Lhx1        | Lhx1(+)               |                                                    |                     |                      | Pbx3(+)<br>Uncx(+)                                     |
|           | Trp73       |                       |                                                    |                     |                      | Pbx3(+)<br>Lhx1(+)                                     |
|           | Itga8       |                       |                                                    |                     |                      | Foxo3(+)                                               |
| ET4       | Grik4       | Nr2f2(+)              | Ppargc1a(+)                                        |                     |                      | Taf1(+)                                                |
|           | Foxo1       |                       |                                                    | Cux1(+)             | Foxo1(+)<br>Klf5(+)  | Klf3(+)<br>Ppargc1a(+)                                 |
