# Supplementary figures and images for: Molecular characterization of projection neuron subtypes in the mouse olfactory bulb
Source: eLife journal article supplement (doi:10.7554/elife.65445), 2021-07-22

**Figure1-figure supplement1**

**A**

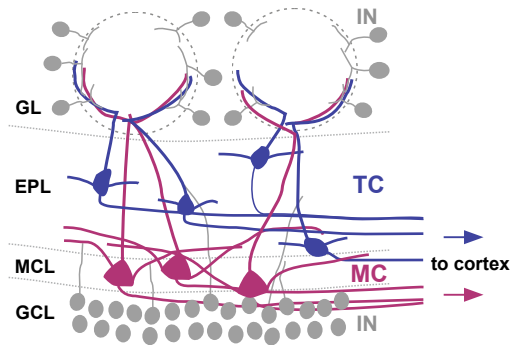

**B**

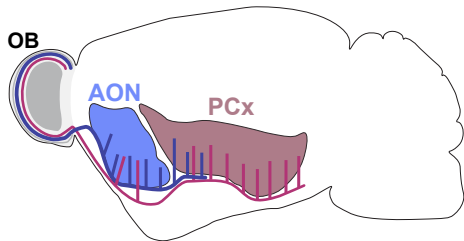

Supplement: supp [file elife-65445-supp-v1.zip › elife_poa_e65445_Figure_1_figure_supplement_1.pdf]

# Figure1-figure supplement2

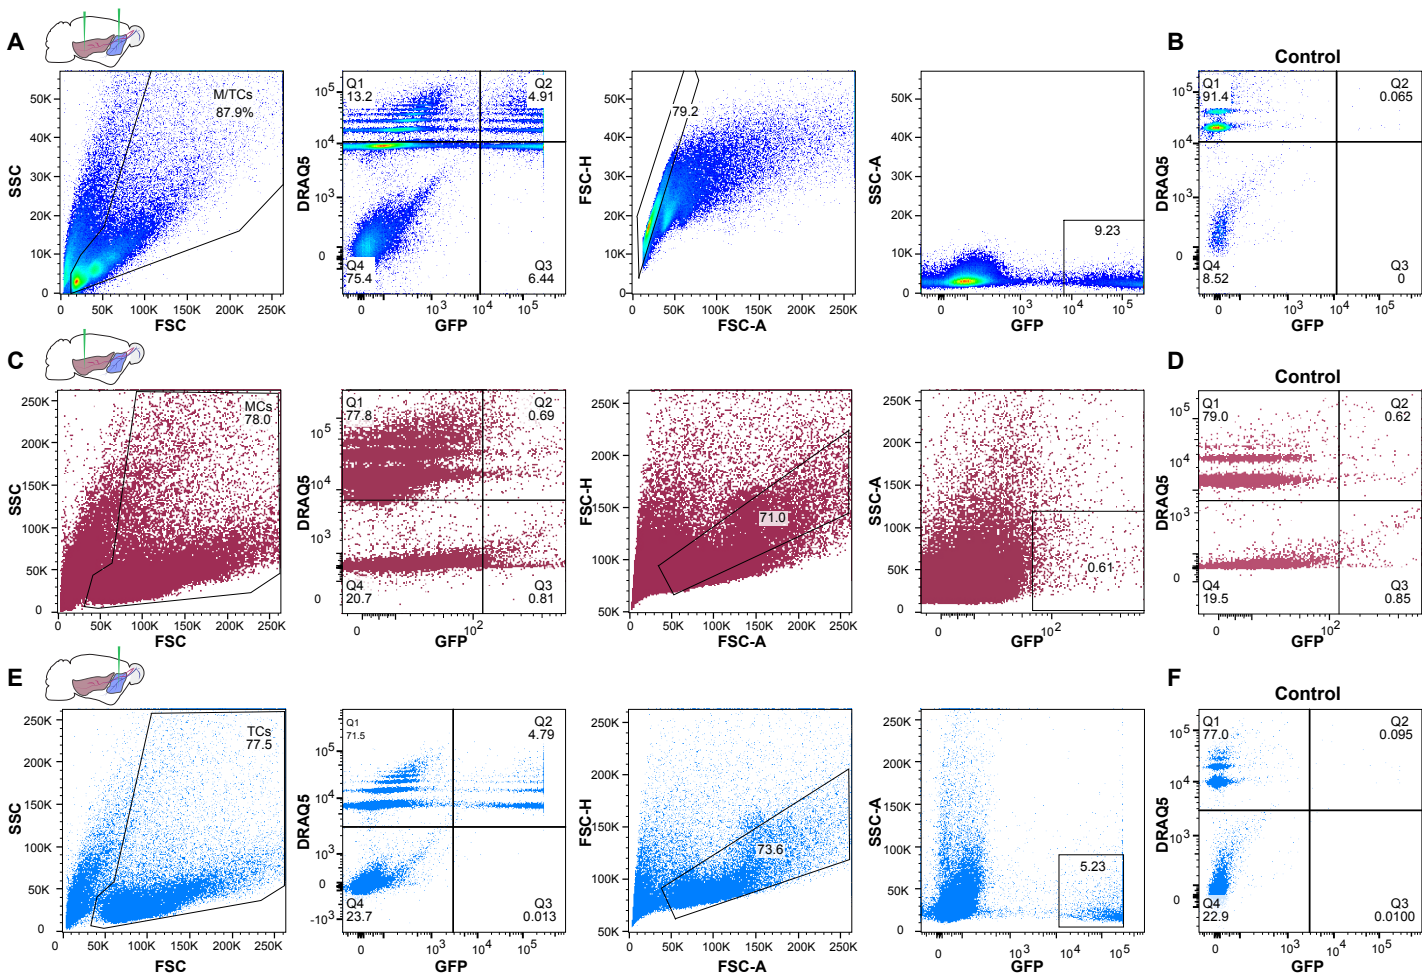

Supplement: supp [file elife-65445-supp-v1.zip › elife_poa_e65445_Figure_1_figure_supplement_2.pdf]

# Figure2-figure supplement1

**A**

**R1**

**R2**

**R3**

UMAP2  
UMAP1

**B**

Fraction of clusters in R1/R2/R3

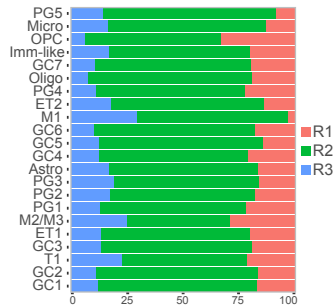

**C**

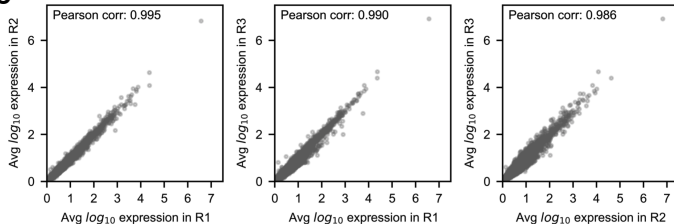

Supplement: supp [file elife-65445-supp-v1.zip › elife_poa_e65445_Figure_2_figure_supplement_1.pdf]

Figure3-figure supplement1

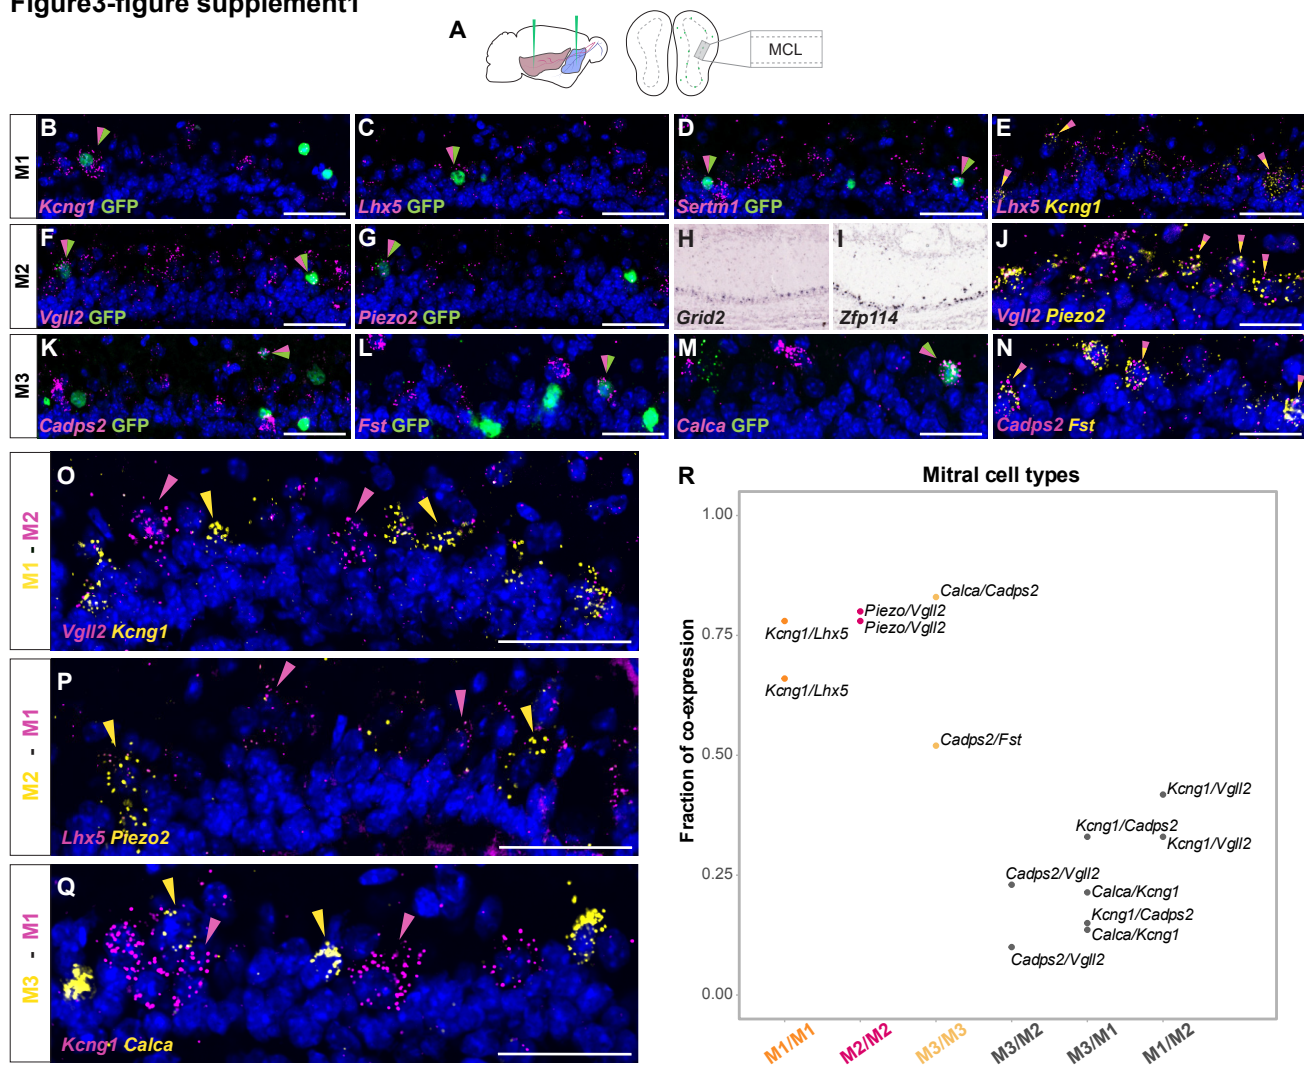

Supplement: supp [file elife-65445-supp-v1.zip › elife_poa_e65445_Figure_3_figure_supplement_1.pdf]

Figure3-figure supplement2

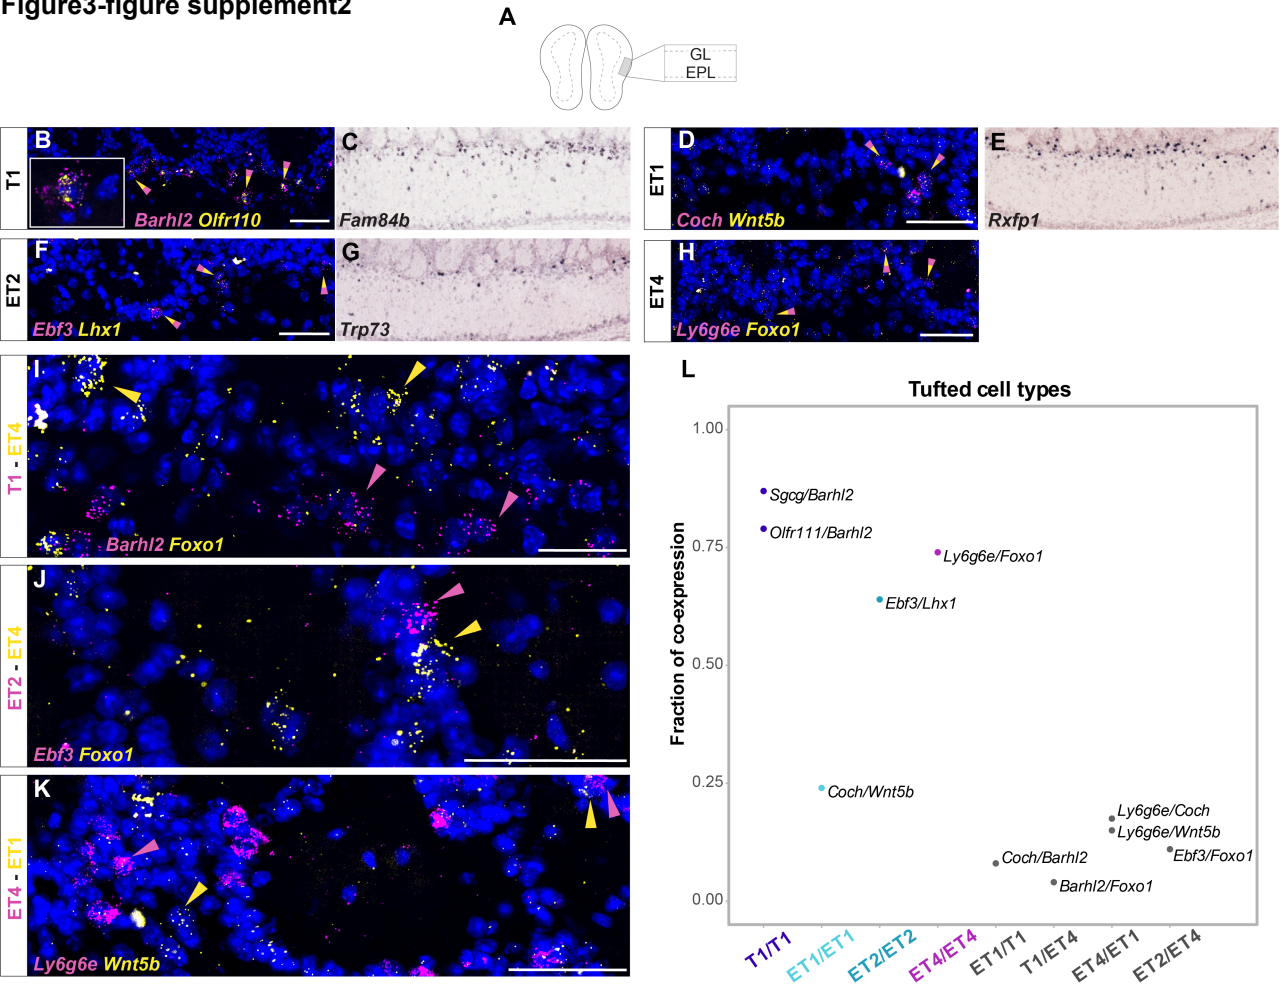

Supplement: supp [file elife-65445-supp-v1.zip › elife_poa_e65445_Figure_3_figure_supplement_2.pdf]

**Figure4-figure supplement1**

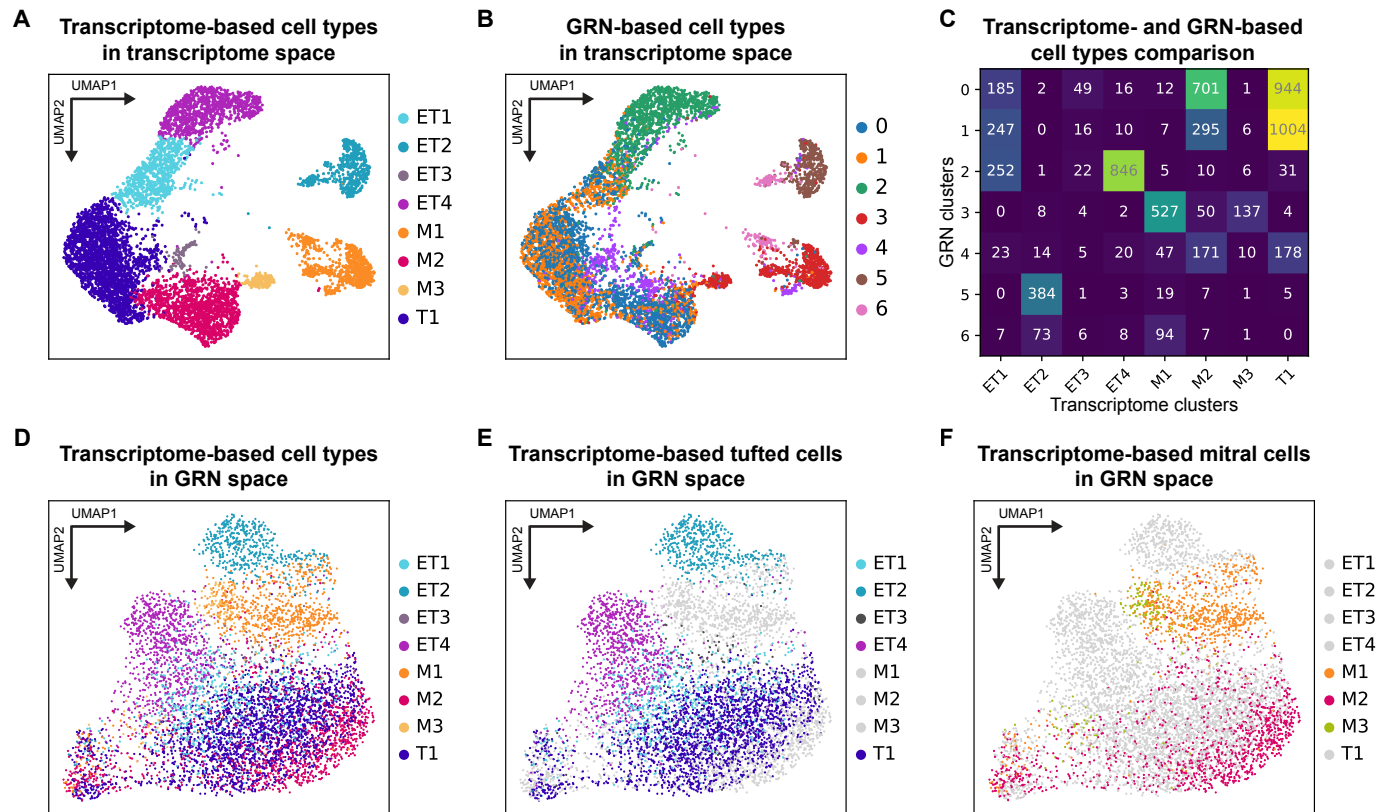

Supplement: supp [file elife-65445-supp-v1.zip › elife_poa_e65445_Figure_4_figure_supplement_1.pdf]

Figure4-figure supplement3

A

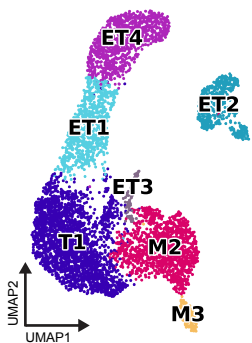

B

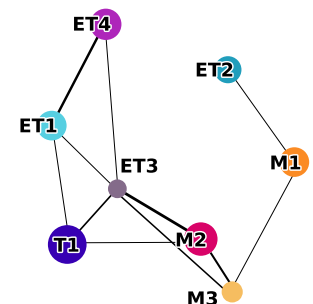

C

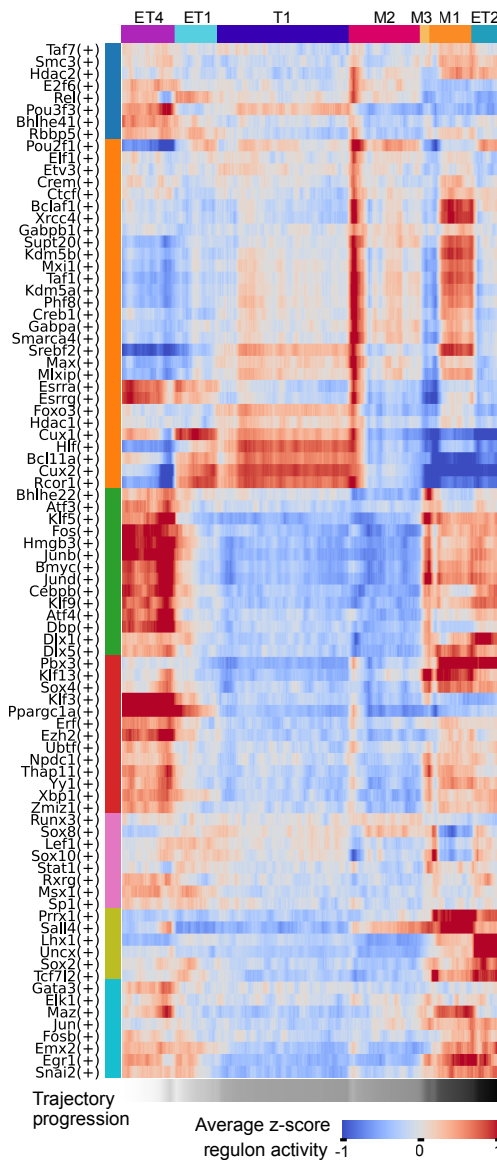

D

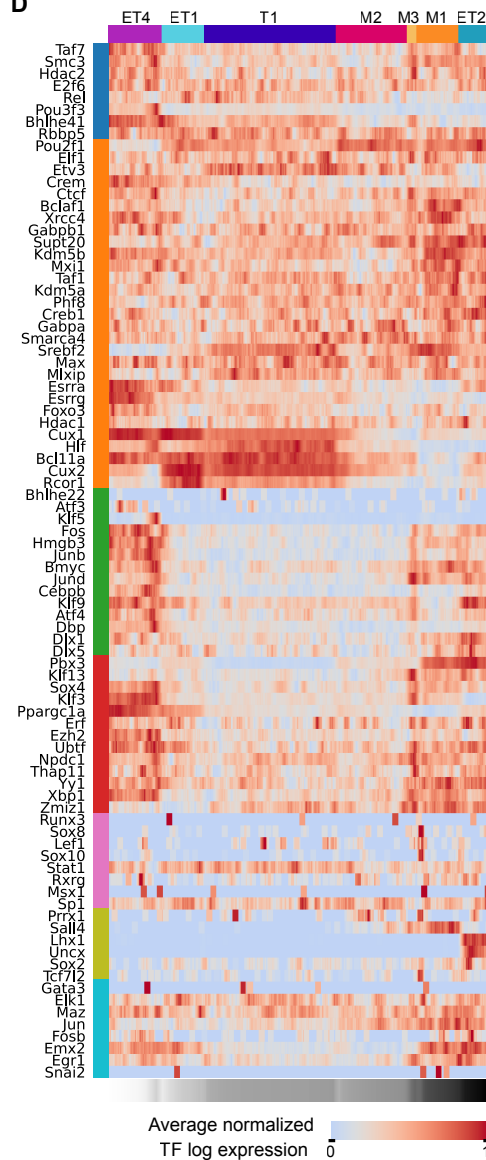

Supplement: supp [file elife-65445-supp-v1.zip › elife_poa_e65445_Figure_4_figure_supplement_3.pdf]

**Figure5-figure supplement1**

**A**

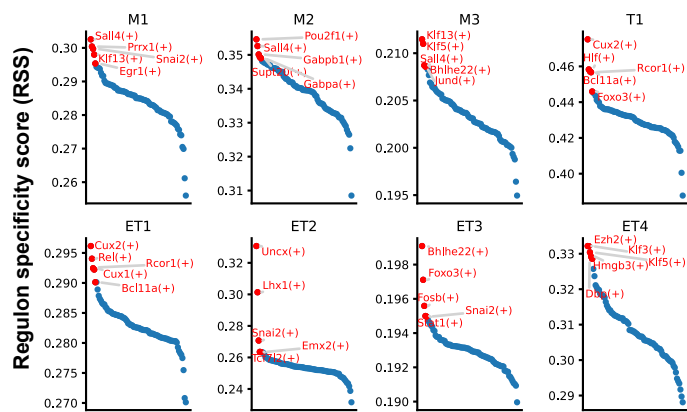

**B**

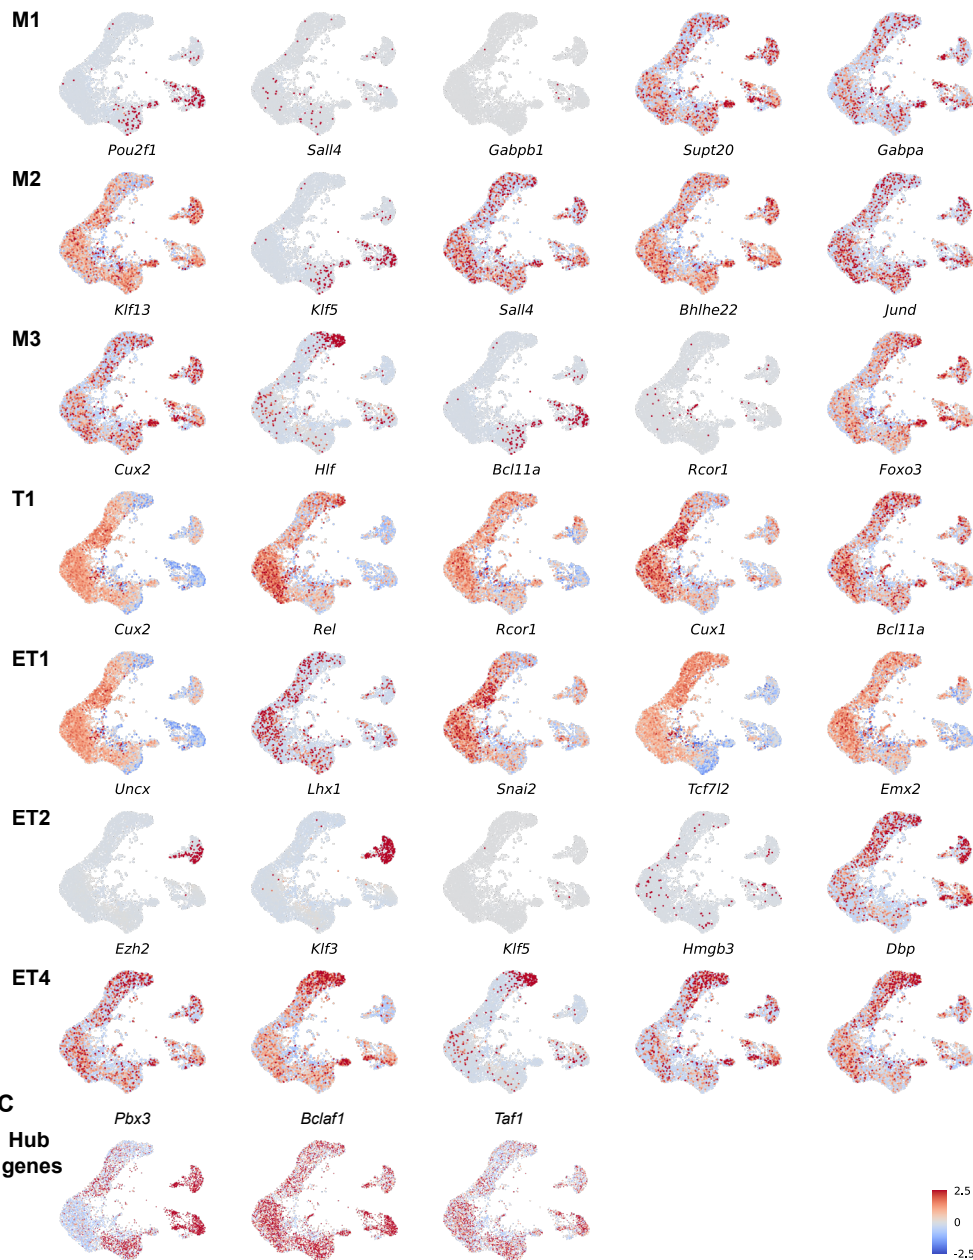

**C**

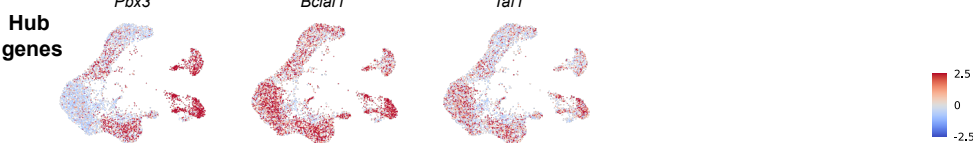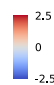

Supplement: supp [file elife-65445-supp-v1.zip › elife_poa_e65445_Figure_5_figure_supplement_1.pdf]

**Figure5-figure supplement2**

**M1**

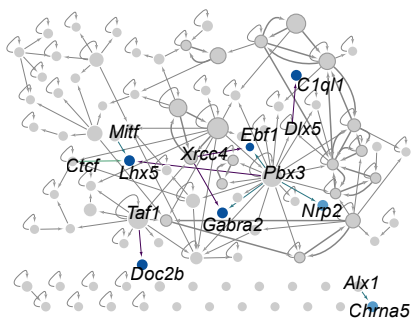

**M2**

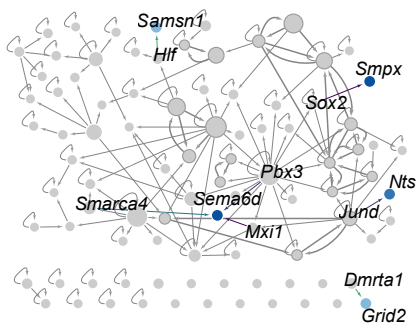

**M3**

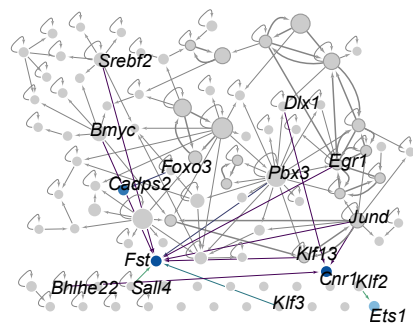

**T1**

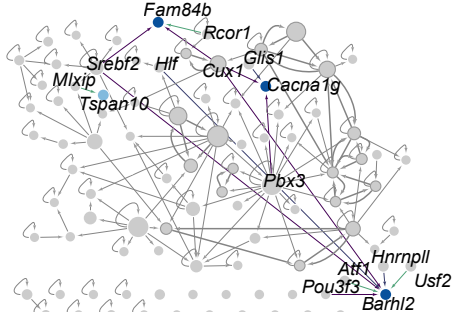

**ET1**

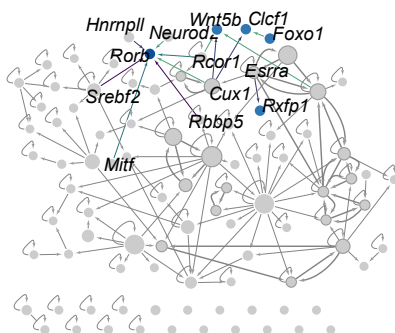

**ET2**

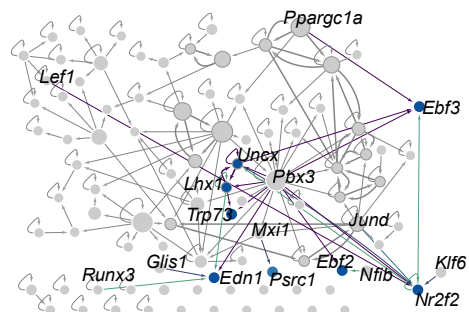

**ET4**

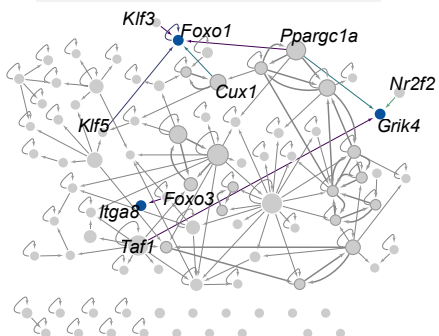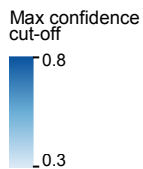

Supplement: supp [file elife-65445-supp-v1.zip › elife_poa_e65445_Figure_5_figure_supplement_2.pdf]

# A

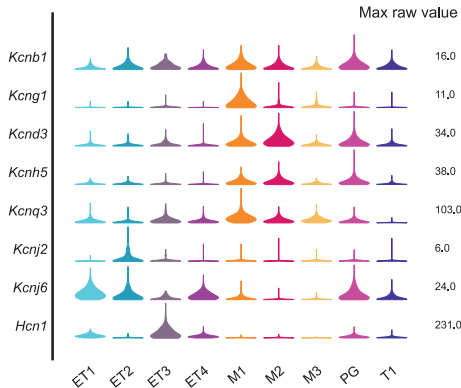

**B**

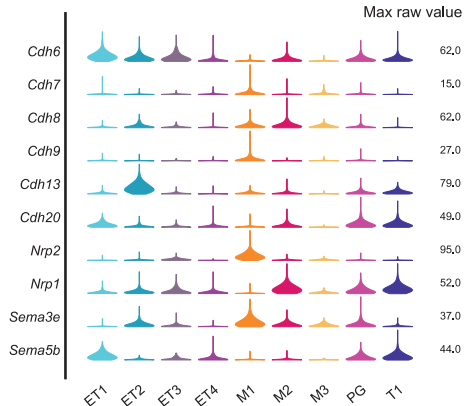

**C**

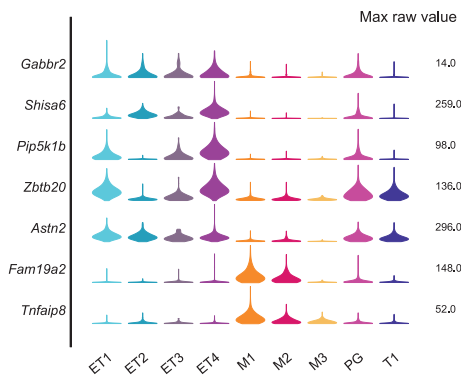

Supplement: supp [file elife_poa_e65445_Figure_3_figure_supplement_3.pdf › elife_poa_e65445_Figure_3_figure_supplement_3.pdf]
